# Supplementary material
Source: Elsevier journal article supplement (https://www.sciencedirect.com/science/article/pii/S2444866416300496)
Supplement: mmc1 [file S2444866416300496:mmc1.docx]

**APPENDIX 1**

**ECQ-PT: Escala de Avaliação do Conforto Espiritual da Pessoa em Fim de Vida – Versão Portuguesa**

MUITO OBRIGADO pela sua colaboração neste estudo sobre o conceito de CONFORTO. Abaixo apresentamos uma lista de afirmações que poderão descrever o seu conforto **neste preciso momento**. A cada questão correspondem seis números; Por favor, assinale com um círculo o número que mais se aproxima do seu estado atual. **Por favor, responda considerando o seu conforto no momento da resposta**.

|  | Discordo  Totalmente | Concordo  Totalmente |
| --- | --- | --- |
| 1. Quando preciso de ajuda tenho sempre alguém com quem posso contar.  2. A minha situação deixa-me em baixo.  3. Sinto-me confiante.  4. Neste momento, sinto que a minha vida vale a pena.  5. Sinto-me encorajado(a) por saber que sou amado(a).  6. Ninguém me compreende.  7. É difícil lidar com a minha ansiedade.  8. Neste momento, não me sinto saudável.  9. As decisões antecipadas assustam-me.  10. Tenho medo do que virá a seguir.  11. Sinto-me muito cansado(a).  12. Estou satisfeito(a).  13. Sinto-me dependente de outras pessoas para tomar decisões.  14. Sinto-me fora de controlo.  15. Experienciei mudanças que me fazem sentir preocupado(a).  16. Necessito de mais informação sobre o meu estado de saúde.  17. Eu não tenho muita opção de escolha quanto aos cuidados em fim de vida.  18. Sinto-me em paz.  19. Sinto-me deprimido(a).  20. Encontrei sentido na minha vida. | 1 2 3 4 5 6  1 2 3 4 5 6  1 2 3 4 5 6  1 2 3 4 5 6  1 2 3 4 5 6  1 2 3 4 5 6  1 2 3 4 5 6  1 2 3 4 5 6  1 2 3 4 5 6  1 2 3 4 5 6  1 2 3 4 5 6  1 2 3 4 5 6  1 2 3 4 5 6  1 2 3 4 5 6  1 2 3 4 5 6  1 2 3 4 5 6  1 2 3 4 5 6  1 2 3 4 5 6  1 2 3 4 5 6  1 2 3 4 5 6 | |

***Muito Obrigada pela sua Colaboração!***

© Reproduced/translated with kind permission of Prof. Katharine Kolcaba.
